# Supplementary material for: Investigating the potential of sepiolite-based adsorbents for levofloxacin removal from aqueous medium: experimental and optimization studies
Source: Research Square preprint supplement (doi:10.21203/rs.3.rs-6907573/v1), 2025-06-25
Supplement: Supplementary file 1 [file 718f0df1315fa2f7a934e31f.docx]

The key highlights of the current research are as follows:

- Impregnation of Sep with MnO₂ enhanced its adsorption capacity for LEV.
- The removal efficiency was 85.8% and 98.2% for Sep and Sep-MnO₂, respectively, under Taguchi-optimized conditions.
- The dominant mechanisms include cation exchange, charge neutralization, and proton transfer.
- From an economic perspective, the analysis revealed that preparing Sep-MnO₂ is cost-effective.
